# Supplementary material
Source: PubMed Central journal article supplement (PMC6735284)
Supplement: jnm220111SupplementalData.pdf [file jnm220111SupplementalData.pdf]

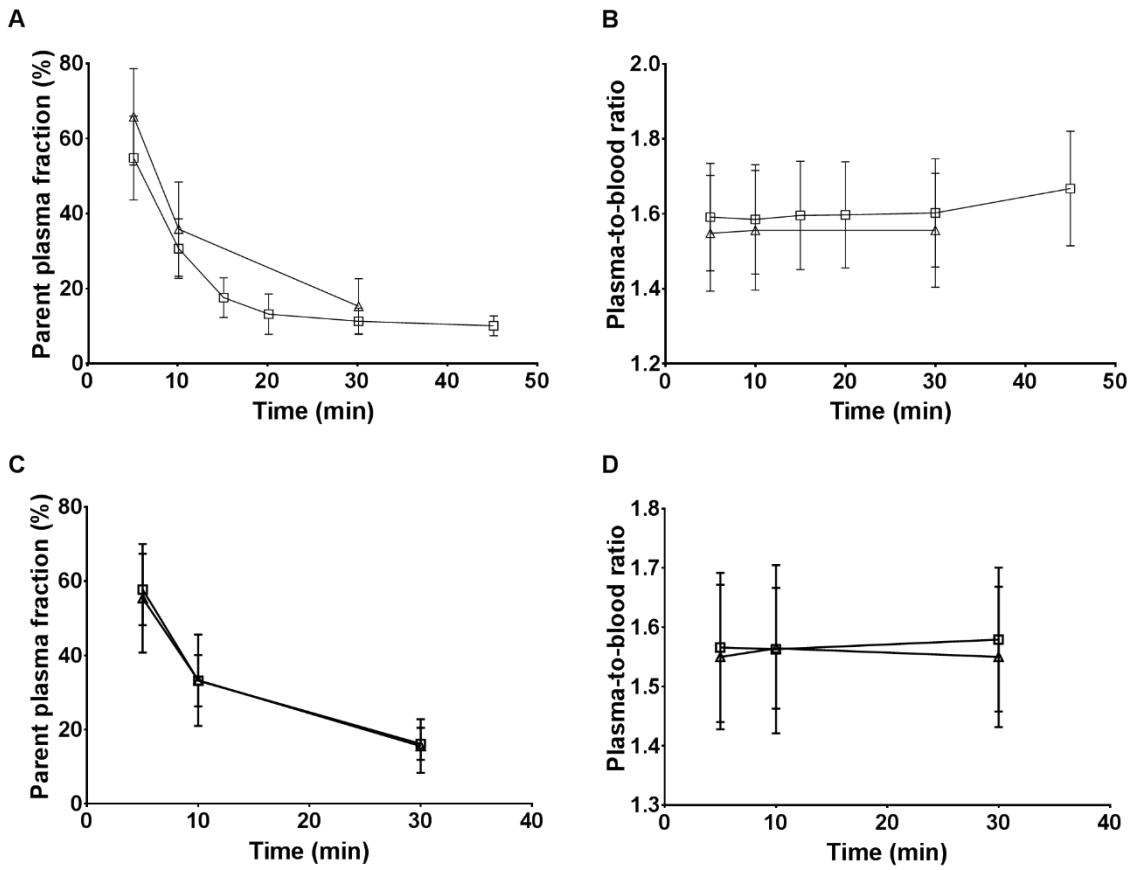

Supplemental figure 1:  $^{18}\text{F}$ -FDHT parent plasma fractions (A) and plasma-to-blood ratios (B) as function of time for arterial (squares) and venous (triangles) blood samples. Corresponding test-retest results for venous blood samples are shown in subplots C and D.

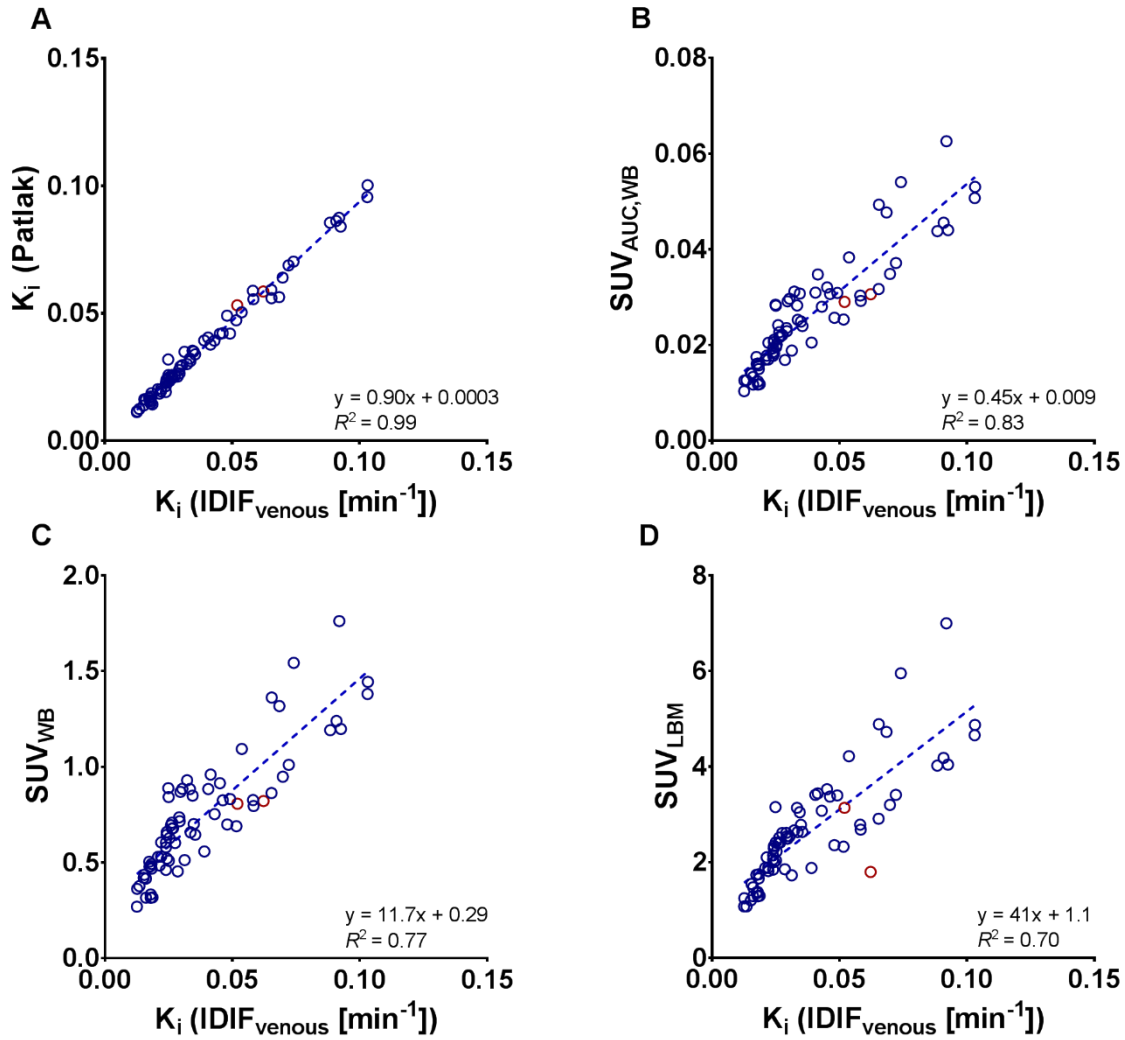

Supplemental figure 2: Scatterplots showing the correlation of  $^{18}\text{F}$ -FDHT Patlak based  $K_i$  (A),  $\text{SUV}_{\text{AUC,WB}}$  (B),  $\text{SUV}_{\text{WB}}$  (C) and  $\text{SUV}_{\text{LBM}}$  (D) with  $K_i$  obtained using an image derived input function corrected using venous blood samples.

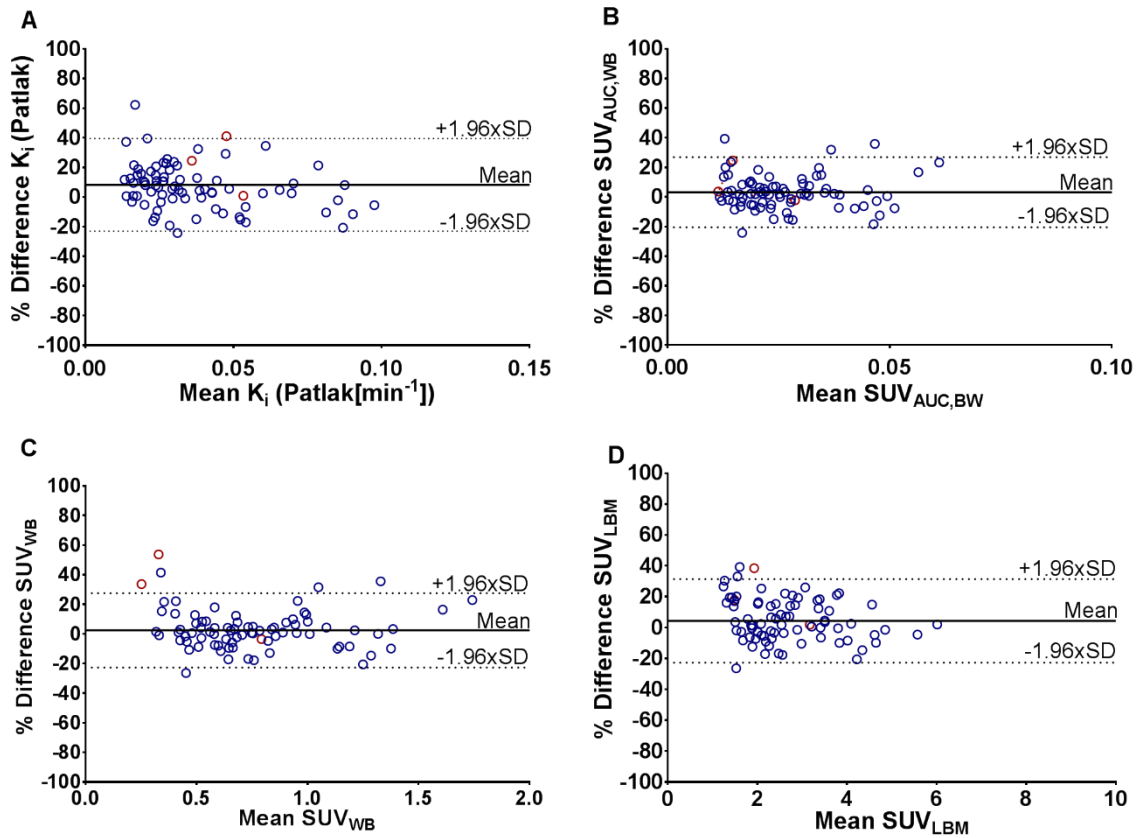

Supplemental figure 3: Bland-Altman plots showing the relative differences in  $^{18}\text{F}$ -FDHT uptake between test and retest scans of Patlak (A),  $\text{SUV}_{\text{AUC, WB}}$  (B),  $\text{SUV}_{\text{WB}}$  (C) and  $\text{SUV}_{\text{LBM}}$  (D) plotted against the mean of test and retest uptake values.

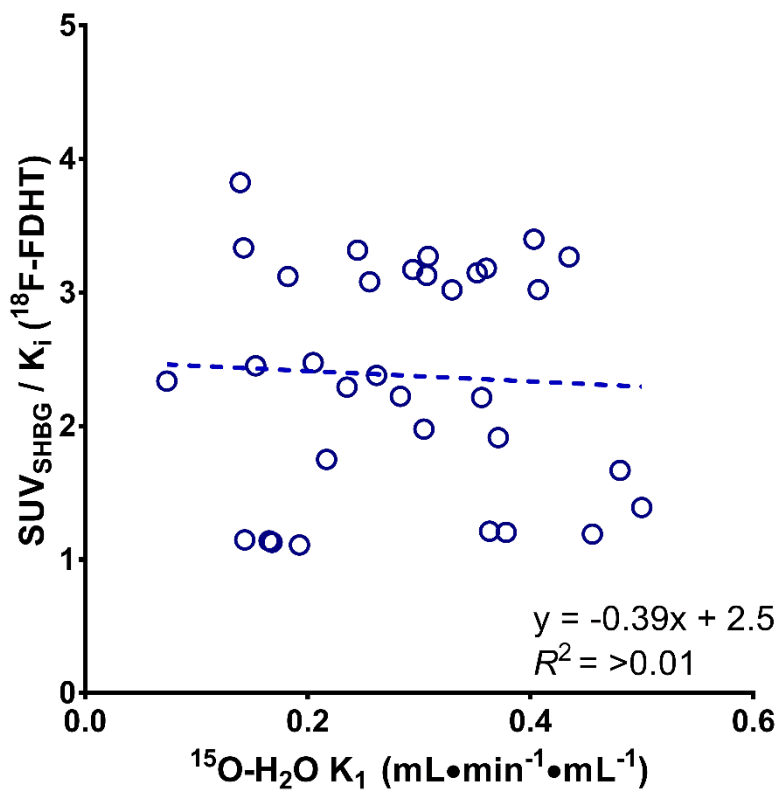

Supplemental figure 4: Discrepancies between NLR based K<sub>i</sub> using venous blood sampling and SUV<sub>BW</sub> cannot be explained by differences in perfusion as assessed in this scatterplot using <sup>15</sup>O-H<sub>2</sub>O based K<sub>1</sub>.

Supplemental table 1: Quantitative <sup>18</sup>F-FDHT uptake metrics

| Continuous arterial sampling | Test   |      | Retest |      |
|------------------------------|--------|------|--------|------|
|                              | Median | IQR  | Median | IQR  |
| K <sub>1</sub>               | 0.12   | 0.05 | -*     | -*   |
| K <sub>2</sub>               | 0.29   | 0.37 | -*     | -*   |
| K <sub>3</sub>               | 0.21   | 0.15 | -*     | -*   |
| V <sub>b</sub>               | 0.07   | 0.05 | -*     | -*   |
| K <sub>i</sub>               | 0.05   | 0.04 | -*     | -*   |
| IDIF <sub>venous</sub>       |        |      |        |      |
| K <sub>1</sub>               | 0.11   | 0.09 | 0.11   | 0.06 |
| K <sub>2</sub>               | 0.28   | 0.34 | 0.29   | 0.41 |
| K <sub>3</sub>               | 0.15   | 0.10 | 0.16   | 0.17 |
| V <sub>b</sub>               | 0.06   | 0.05 | 0.07   | 0.05 |
| K <sub>i</sub>               | 0.03   | 0.03 | 0.03   | 0.03 |
| Simplified models            |        |      |        |      |
| Patlak K <sub>i</sub>        | 0.03   | 0.03 | 0.03   | 0.02 |
| SUV <sub>AUC,PP</sub>        | 0.03   | 0.03 | 0.04   | 0.03 |
| SUV <sub>AUC,WB</sub>        | 0.02   | 0.01 | 0.02   | 0.02 |
| SUV <sub>PP</sub>            | 2.27   | 3.08 | 3.20   | 2.54 |
| SUV <sub>WB</sub>            | 0.69   | 0.38 | 0.69   | 0.48 |
| SUV <sub>BW</sub>            | 3.05   | 1.78 | 3.06   | 2.10 |
| SUV <sub>LBM</sub>           | 2.42   | 1.33 | 2.51   | 1.69 |
| SUV <sub>SHBG</sub>          | 0.06   | 0.09 | -¥     | -¥   |

\* No arterial sampling was performed for the retest scans; ¥ SHBG levels were only determined prior to the first FDHT scan

IDIF<sub>venous</sub>=Non-linear regression using image derived input function corrected using venous blood samples; K<sub>i</sub>=Net influx rate; V<sub>b</sub>=Blood volume fraction; SUV=Standardized uptake values; SUV<sub>AUC,PP</sub>=SUV normalized to the area under the parent plasma input curve; SUV<sub>AUC,WB</sub>=SUV normalized to the area under the whole blood input curve; SUV<sub>PP</sub>=SUV normalized to the parent plasma concentration; SUV<sub>WB</sub>=SUV normalized to the whole blood activity concentration; SUV<sub>BW</sub>=SUV normalized to bodyweight; SUV<sub>LBM</sub>=SUV normalized to lean body mass; SUV<sub>SHBG</sub>=SUV corrected for SHBG level

Supplemental table 2: Repeatability coefficients of several quantitative <sup>18</sup>F-FDHT uptake metrics per lesion.

| <i>Quantitative tracer uptake measures</i> | <i>Absolute difference</i> |           | <i>Relative difference</i> |               |
|--------------------------------------------|----------------------------|-----------|----------------------------|---------------|
|                                            | <i>Mean</i>                | <i>RC</i> | <i>Mean (%)</i>            | <i>RC (%)</i> |
| IDIF <sub>venous</sub> K <sub>i</sub>      | 0.004                      | 0.011     | 11.2                       | 34.6          |
| Patlak K <sub>i</sub>                      | 0.003                      | 0.009     | 10.1                       | 28.3          |
| SUV <sub>AUC,PP</sub>                      | 0.003                      | 0.010     | 10.0                       | 20.9          |
| SUV <sub>AUC,WB</sub>                      | 0.003                      | 0.007     | 2.4                        | 15.0          |
| SUV <sub>PP</sub>                          | 0.002                      | 2.253     | 10.1                       | 61.3          |
| SUV <sub>WB</sub>                          | 0.054                      | 0.196     | 6.6                        | 19.7          |
| SUV <sub>BW</sub>                          | 0.184                      | 0.732     | 6.5                        | 23.8          |
| SUV <sub>LBM</sub>                         | 0.155                      | 0.574     | 6.5                        | 23.8          |

IDIF<sub>venous</sub>=Non-linear regression using image derived input function corrected using venous blood samples K<sub>i</sub>=Net influx rate; SUV=Standardized uptake values; SUV<sub>AUC,PP</sub>=SUV normalized to the area under the parent plasma input curve; SUV<sub>AUC,WB</sub>=SUV normalized to the area under the whole blood input curve; SUV<sub>PP</sub>=SUV normalized to the parent plasma concentration; SUV<sub>WB</sub>=SUV normalized to the whole blood activity concentration; SUV<sub>BW</sub>=SUV normalized to bodyweight; SUV<sub>LBM</sub>=SUV normalized to lean body mass
